# Supplementary material for: The Effect of Variable Light Source and Light Intensity on the Growth of Three Algal Species
Source: MDPI journal article supplement (doi:10.3390/cells11081293), 2022-04-11
Supplement: s1 [file s1]

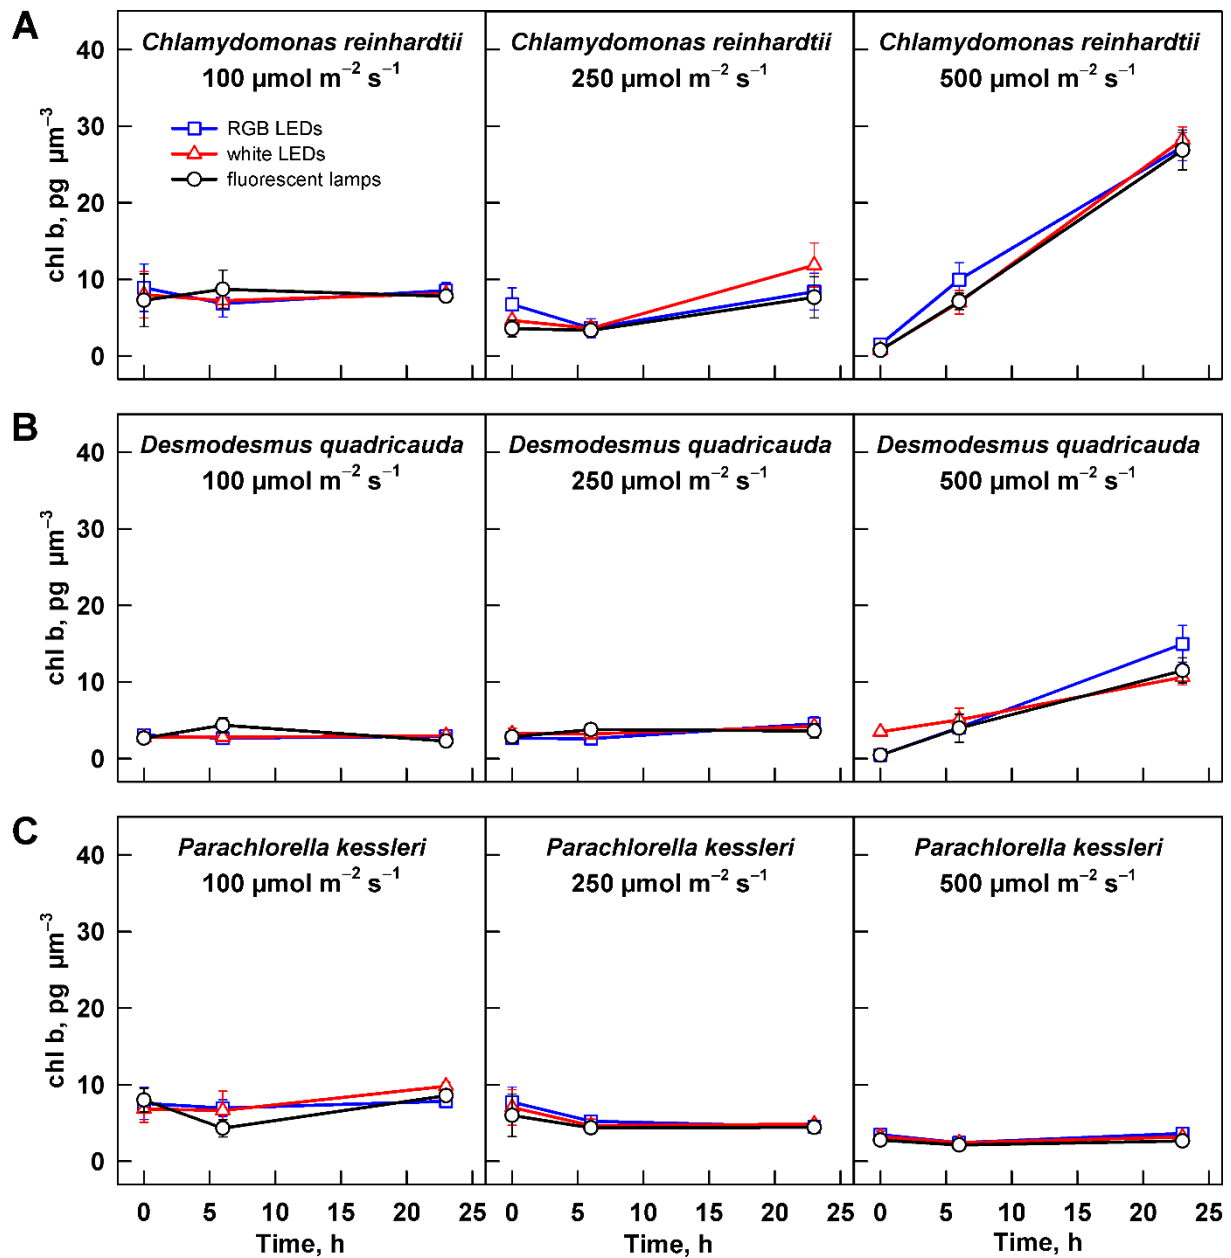

**Figure S1** Changes in chlorophyll *b* content in the cultures grown at different light intensities. Cultures of (A) *Chlamydomonas reinhardtii*, (B) *Desmodesmus quadricauda*, (C) *Parachlorella kessleri* were grown at incident light intensity 100, 250 and 500  $\mu\text{mol m}^{-2} \text{s}^{-1}$  on different light sources: fluorescent lamps (black circles), RGB LEDs (blue squares) and white LEDs (red triangles). Chlorophyll content was normalized to the total volume of the culture at the particular time-point to allow direct comparison between treatments and organisms. Data of three biological replicates are presented as means  $\pm$  SE.

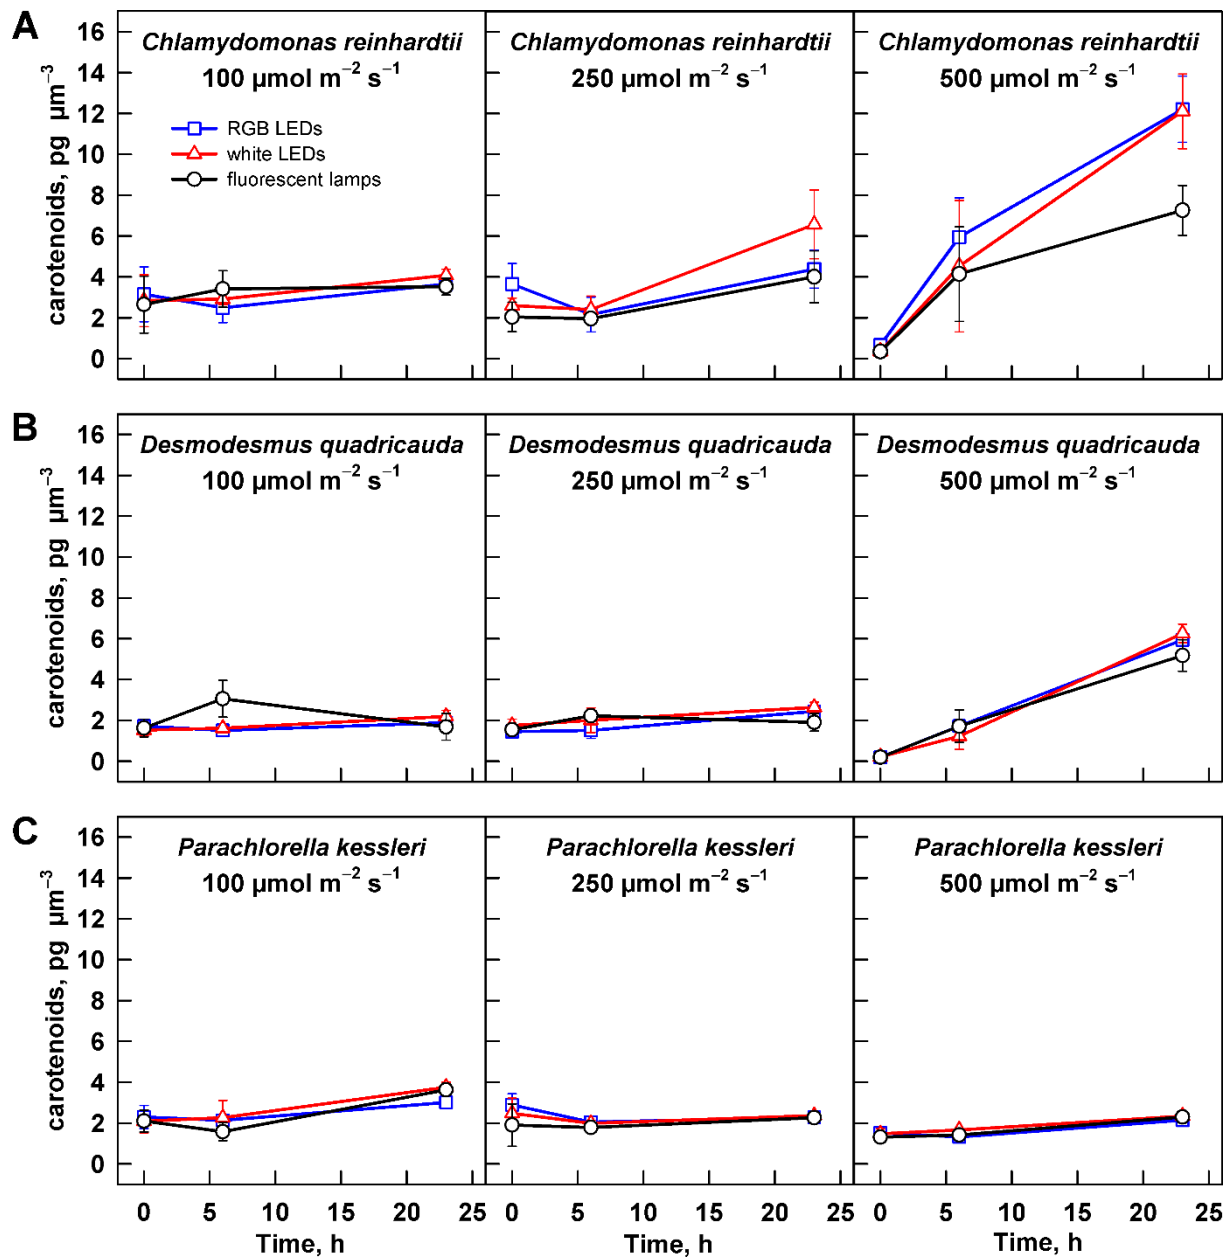

**Figure S2** Changes in carotenoid content in the cultures grown at different light intensities. Cultures of (A) *Chlamydomonas reinhardtii*, (B) *Desmodesmus quadricauda*, (C) *Parachlorella kessleri* were grown at incident light intensity 100, 250 and 500  $\mu\text{mol m}^{-2} \text{s}^{-1}$  on different light sources: fluorescent lamps (black circles), RGB LEDs (blue squares) and white LEDs (red triangles). Carotenoid content was normalized to the total volume of the culture at the particular time-point to allow direct comparison between treatments and organisms. Data of three biological replicates are presented as means  $\pm$  SE.
